# Supplementary material for: Solution-processable ZnO nanoparticles obtained by low-temperature solventless synthesis
Source: Royal Society of Chemistry journal article supplement (doi:10.1039/c0jm03812a), 2011-01-01
Supplement: c0jm03812a.pdf [file c0jm03812a.pdf]

## **Low-Temperature Solventless Synthesis of Carboxylate-Capped ZnO Nanoparticles**

Marc Estruga,<sup>\*a</sup> Concepción Domingo<sup>b</sup> and José A. Ayllón<sup>\*a</sup>

<sup>a</sup> *Departamento de Química, Universidad Autónoma de Barcelona, Campus UAB, 08193 Bellaterra, Spain. Fax: +34 93581 2920; Tel: +34 93581 2164; E-mail: JoseAntonio.Ayllon@uab.es; mestruga@qf.uab.cat*

<sup>b</sup> *Instituto de Ciencia de Materiales de Barcelona, CSIC, Campus UAB, 08193 Bellaterra, Spain.*

### **Electronic Supplementary Information**

**Table S1.** Experimental details of additional samples.

| Carboxylic Acid | ZAD:acid ratio | Mixing Method | Temperature (°C) | Time (h) | Cited in  |
|-----------------|----------------|---------------|------------------|----------|-----------|
| Phenylvaleric   | 5:1            | CE            | 90               | 67       | Figure 2B |
| Phenylvaleric   | 3:1            | CE            | 90               | 67       | Figure 2B |
| Lauric          | 5:1            | Grinding      | 90               | 70       | Figure 5  |
| TODA            | 5:1            | CE            | 90               | 78       | Figure 4B |

**Table S2.** Carboxylate peaks position of samples PhAc-ZnO (a); Pip-ZnO (b); FPhAc-ZnO (c); and Cin-ZnO (d) in the ATR-FTIR spectrum (Figure S2).

| Sample    | COO st asymm (cm <sup>-1</sup> ) | COO st symm (cm <sup>-1</sup> ) | $\Delta\nu$ (cm <sup>-1</sup> ) | Coordination mode  |
|-----------|----------------------------------|---------------------------------|---------------------------------|--------------------|
| PhAc-ZnO  | 1551                             | 1400                            | 151                             | Bridging           |
| Pip-ZnO   | 1548                             | 1398                            | 150                             | Bridging           |
| FPhAc-ZnO | 1549                             | 1403                            | 146                             | Bridging           |
| Cin-ZnO   | 1544                             | 1409                            | 135                             | Bridging + chelate |

**Table S3.** Synthesis time as a function of benzoic acid content.

| % benzoic acid | Processing time at 90 °C (h) |
|----------------|------------------------------|
| 0              | 30                           |
| 20             | 42                           |
| 30             | 47                           |
| 40             | 54                           |
| 50             | 65                           |
| 70             | 120                          |
| 85             | 144                          |

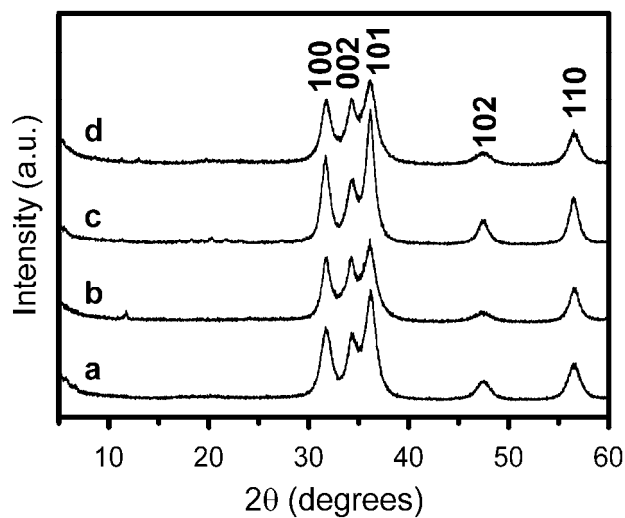

**Figure S1.** XRD patterns of several carboxylate-capped ZnO nanoparticles: PhAc-ZnO (a); Pip-ZnO (b); FPhAc-ZnO (c); and Cin-ZnO (d).

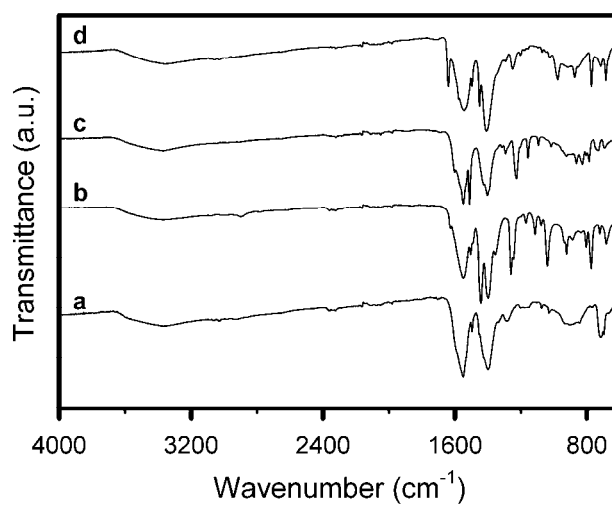

**Figure S2.** ATR-FTIR spectra of PhAc-ZnO (a); Pip-ZnO (b); FPhAc-ZnO (c); and Cin-ZnO (d).

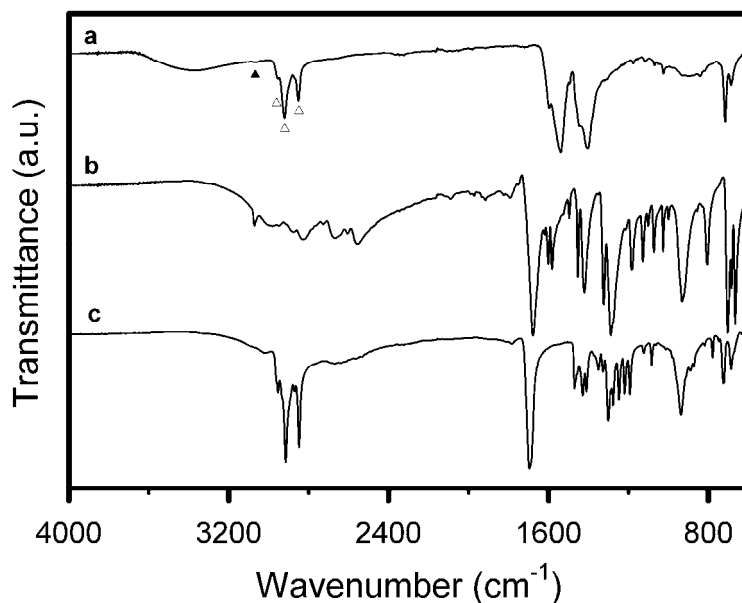

**Figure S3.** ATR-FTIR spectra of Bz-La-ZnO sample (a); benzoic acid (b) and lauric acid (c). Both ligands are present in the sample, as denoted by the aromatic C-H stretching peak (▼ at 3070  $\text{cm}^{-1}$ ) and aliphatic C-H stretching peaks (▽ at 2960, 2919 and 2849  $\text{cm}^{-1}$ ).

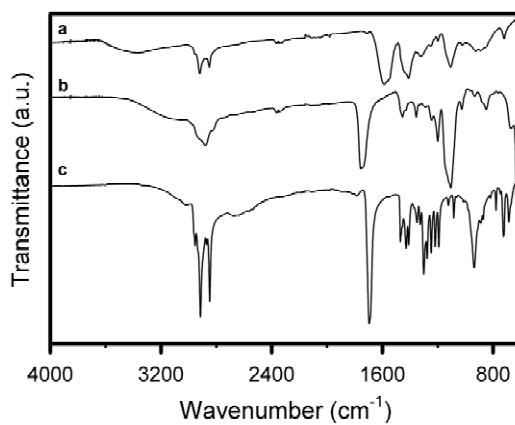

**Figure S4.** ATR-FTIR spectra of TODA-La-ZnO sample (a); 3,6,9-trioxadecanoic acid (b) and lauric acid (c).

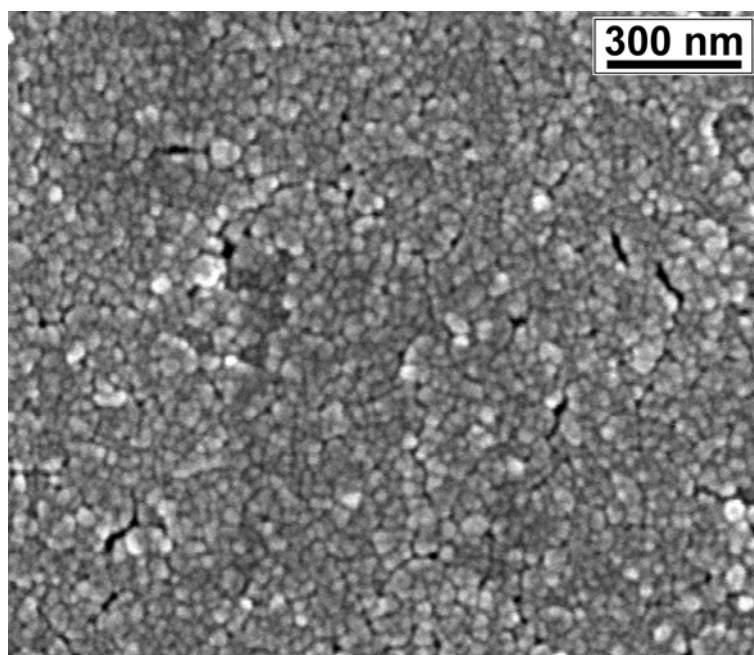

**Figure S5.** SEM micrograph of a ZnO thin film obtained by photo-assisted elimination of the laurate capping agent.
